# Supplementary material
Source: PubMed Central journal article supplement (PMC3382941)

## Supplementary Material and Methods

### Real-time quantitative PCR (RQ-PCR) for human *EVI1* and *MDS-EVI1*

RNA isolation, cDNA synthesis were performed as described.<sup>1-3</sup> A diagnostic assay was developed to detect EVI1 expression in AML patients.<sup>3</sup> In summary, Real-time quantitative PCR (Q-PCR) was performed using human EVI1 forward and reverse primers plus probes located on exon 14 and 15. The  $\Delta\Delta C_t$  method was used to calculate relative expression using PBGD (Porphobilinogen deaminase) as a reference gene and the EVI1 overexpressing ovarian carcinoma cell line SKOV3 served as a calibrator; all cases with Ct values > 30.5 were discarded.<sup>2,3</sup> Optimal cut-off levels for EVI1 positivity were determined on a cohort of 458 patients. A cut-off of 0.1 was determined: cases with an expression  $\geq 0.1$  relative to the EVI1 expression of SKOV3 were labelled as EVI1<sup>pos</sup> and cases with a relative expression < 0.1 were determined EVI1<sup>neg</sup>.

Primers and probe sequences are shown in Table S1.

### RQ-PCR of murine genes

mRNA expression of *Evi1*, *Mds-Evi1*, *Meis1* and *Prdm16* in mBM cells or colonies was determined by RQ-PCR as described previously.<sup>4</sup> mRNA expression was normalized against *HPRT* (hypoxanthine-guanine phosphoribosyl transferase) and mBM transduced with pMSCVpuro (EV) were used as a calibrator. All primer sequences are listed in Table S2.

### Colony assays

Retrovirally infected mononucleated mBM ( $1 \times 10^5$  cells/dish) were plated in 1% methylcellulose medium (M3231; Stem Cell Technologies, Vancouver, Canada) supplemented with 10 ng/ml IL3, 10 ng/ml IL6, 10 ng/ml GM-CSF and 20 ng/ml SCF (Peprotech EC, London, UK) and selective antibiotics. Colonies were counted after 7 days of culture, and were subsequently plated at a concentration of  $2 \times 10^4$  cells per dish, for 3 additional rounds of weekly replating (Figure S4A). During every replating, colonies were scored, and remaining cells were harvested for RNA isolation and cytopins. After 4 rounds of plating, cells were cultured in IMDM containing 10% FCS supplemented with 10 ng/ml IL3, 10 ng/ml IL6, 10 ng/ml GM-CSF and 20 ng/ml SCF to establish multiclonal cell lines. Clonal MLL-AF9 mBM cell lines were isolated from an additional round of low density Methocult culture (Figure S5A).

### Cell culture of MLL-AF9 cell line 4166 and MLL-AF9 mBM clones

The 4166 cell line was established from spleen cells of a leukemic MLL-AF9 knock-in mouse model and its characterization is described previously.<sup>5</sup> 4166 cells were routinely maintained in IMDM containing 15% FBS and 2ng/ml murine IL3. Myeloid colony-forming assays were performed with 4166 cells and various clonal MLL-AF9 mBM cell lines in methylcellulose medium under myeloid conditions, and colonies were counted and scored after 7 days of culture as previously described.<sup>5</sup>

### Western blot analysis

Cells were lysed in Carin buffer (20 mM Tris-HCL, 137 mM NaCl, 10 mM EDTA, 50 mM NaF, 1% Triton, 10% glycerol) containing protease inhibitors. EVI1 protein expression in colonies of MLL-AF9 transduced mBM cells was detected with polyclonal antibodies directed against the C-terminal or N-terminal part of murine EVI1 (kind gift of Prof. JN Ihle). EVI1 protein levels in AML samples were detected by a rabbit polyclonal EVI1

antibody (#2265, Cell Signaling, Danvers, USA). For the western blot analysis performed on 4166 cells the following antibodies were used: EVI1 (C-20, SC-8707-R, Santa Cruz Biotech., Santa Cruz, CA), Caspase-3, -8, -9 or -12, PARP (Cell Signaling) and HSP90 (BD Biosciences, San Jose, CA). Equal loading of protein was determined by reprobing the blots with an antibody against Actin (Santa Cruz, or Sigma-Aldrich, St. Louis, MO).

### **Retroviral transduction of murine Bone Marrow (mBM) cells**

Retroviral constructs harboring the MLL fusions: pMSCVneo MLL-AF6, pMSCVpuro MLL-AF9, pMSCVneo MLL-AF9, pMSCVpuro MLL-ENL and pMSCVpuro E2A-PBX, were published previously.<sup>6,7</sup> Retroviral supernatants were produced in 293T cells co-transfected with the packaging vector pCL-Eco together with pMSCV constructs, using FuGENE6 transfection reagent (Roche, Mannheim, Germany) according to the manufacturer's protocol. Retroviral supernatants were collected 2 days after transfection and filtered through a 0.45µm cellulose acetate filter. Lin<sup>-</sup> cells<sup>8</sup> or Ficoll gradient purified mononuclear mBM cells were transduced twice on two consecutive days with the aid of RetroNectin (Lonza, Basel, Switzerland) mediated viral transduction.

### **ChIP-on-chip experiments**

Chromatin immunoprecipitations on cross-linked material of MLL-AF9 mBM clones with either isotype-IgG control (#2729, Cell Signaling) or H3K79me2 (Abcam, Cambridge, UK; antibody ab3594) antibodies were performed according to the ChIP protocol available on the Millipore website <http://www.millipore.com/userguides/tech1/mcproto407>.

Immunoprecipitated material was de-crosslinked and 10 µl was amplified using a Whole Genome Amplification kit (WGA2/WGA3; Sigma-Aldrich, Zwijndrecht, The Netherlands). Subsequent fragmentation of amplified DNA, labeling and hybridization to Affymetrix Mouse promoter 1.0R arrays was done according to manufacturer's recommendations (Affymetrix, Santa Clara, CA, USA). Visualization of enriched regions was carried out using Affymetrix Integrated Genome Browser (IGB) software.

### **Knockdown of murine *Evi1* or *Dot1L* using lentiviral shRNAs**

Commercial nontarget control (SHC002), *Evi1* short hairpin RNA (SH1152; CCCAATCACCAAGTGAAGTTA), *Dot1L* short hairpin RNAs (SH6319: GTCCAGTTTGTACTGTCAATA; SH6320: GCTGACCTACAATGACCTGAT; SH6322: CGGCAGAATCGTATCCTCAAA) or PLKO1.EV lentiviral vectors were selected from the mission shRNA library (Mission© library; Sigma-Aldrich, Zwijndrecht, The Netherlands). After initial pilot studies testing of more than 10 different shRNAs against *Evi1*, SH1152 was selected as the only shRNA leading to more than 50% reduction of murine EVI1 protein expression (EB, MH and RD, data not shown).

ShRNA lentivirus was produced in 293T cells after co-transfection of SHC002, SH1152, or PLKO1.EV together with the packaging plasmids pSPAX2 and pMDG.2. Culture supernatants containing pseudovirus were harvested 48–72 h post-transfection. Lentivirus containing culture supernatants were filtered through a 0.45µm filter (Millipore Bedford, MA) and concentrated by ultracentrifugation at 25,000 rpm for 2 hours at 4°C, and viral pellets were resuspended in serum-free IMDM. Viral titers were determined by transducing NIH3T3 cells using diluted culture supernatants and counting the number of colonies after 13 days of culturing in the presence of puromycin. A multiplicity of infection (MOI) of 100 was used in subsequent experiments by spin transduction, or RetroNectin mediated transduction.

### Retroviral transduction of defined hematopoietic cell populations

Bone marrow from 6-8 week old C57Bl/6 females was used to isolate HSC as Lin(CD3e CD4 CD8a CD19 CD45R CD127 Ter119 Gr1)- CD34- Sca1+ c-Kit+ and GMP as Lin- Sca1- c-Kit+ CD34+ CD16/32+ (eBiosciences) using a FACS Aria cell sorter (BD Biosciences). Freshly isolated HSC and GMP were retrovirally transduced with MLL-AF9, after 16 hours the cells were plated in semisolid media (M3234) supplemented with 10ng/ml of each IL-3 and IL-6 and 20ng/ml SCF. The cells were replated every 7 days for 3 weeks, which allows for non MLL-AF9 expressing cells to die out. At the end of third plating the cells were collected, total RNA was extracted using Trizol (Invitrogen) and reverse-transcribed (BioLine). cDNA was used in quantitative SYBR green based PCR reaction (BioLine) with *Evi1* specific primers Evi1F ctcgaagccttcaggaacac and Evi1R agcttcaagcgggtcagtta.

### Evi1 promoter luciferase assay

For promoter luciferase experiments, per well  $0.5 \times 10^6$  Jurkat cells were seeded in 24-well plates. Cells were transfected using X-tremeGENE HP DNA transfection reagent (Roche Applied Science, Indianapolis, IN, USA) with 1 $\mu$ g expression plasmid, 1 $\mu$ g pGL3-EVI1 (harboring the human EVI1 promoter<sup>9</sup>, kind gift of Kinuko Mitani) and 100ng pGL3 Renilla. After 48 hours of culture, cells were harvested and luciferase activity was measured using Dual-Luciferase reporter reagents (Promega, Madison, WI, USA).

### Supplementary References

1. Valk PJ, Verhaak RG, Beijen MA, et al. Prognostically useful gene-expression profiles in acute myeloid leukemia. *N Engl J Med*. 2004;350(16):1617-1628.
2. Lugthart S, van Drunen E, van Norden Y, et al. High EVI1 levels predict adverse outcome in acute myeloid leukemia: prevalence of EVI1 overexpression and chromosome 3q26 abnormalities underestimated. *Blood*. 2008;111(8):4329-4337.
3. Gröschel S, Lugthart S, Schlenk RF, et al. High EVI1 expression predicts outcome in younger adult patients with acute myeloid leukemia and is associated with distinct cytogenetic abnormalities. *J Clin Oncol*. 2010; 28(12):2101-2107
4. Chen W, Kumar AR, Hudson WA, et al. Malignant transformation initiated by MLL-AF9: gene dosage and critical target cells. *Cancer Cell*. 2008;13(5):432-440
5. Kumar AR, Li Q, Hudson WA, et al. A role for MEIS1 in MLL-fusion gene leukemia. *Blood*. 2009;113(8):1756-1758.
6. Chueng N, Chan LC, Thompson A, et al. Protein arginine-methyltransferase-dependent oncogenesis. *Nat Cell Biol*. 2007; (10):1208-15.
7. Wong P, Iwasaki M, Somervaille TC et al. Meis1 is an essential and rate-limiting regulator of MLL leukemia stem cell potential. *Genes Dev*. 2007; 21(21):2762-74.
8. Zhang CC, Kaba M, Ge G et al. Angiopoietin-like proteins stimulate ex vivo expansion of hematopoietic stem cells. *Nat Med*. 2006; 12:240-245.
9. Eguchi-Ishimae M, Eguchi M, Ohyashiki K et al. Enhanced expression of the EVI1 gene in NUP98/HOXA-expressing leukemia cells. *Int J Hematol*. 2009;89(2):253-6.

**SUPPLEMENTARY TABLES**

Table S1. Primer sequences

Primer Sequence quantitative pcr

|               |                                         |
|---------------|-----------------------------------------|
| hEVI1ex14-F   | AGTGCCCTGGAGATGAGTTG                    |
| hEVI1ex15-R   | TTTGAGGCTATCTGTGAAGTGC                  |
| Probe EVI1    | CCCCAGTGAGGTATAAAGAGGA                  |
| hPBGD-F       | GGCAATGCGGCTGCAG                        |
| hPBGD-R       | GGGTACCCACGCGAATCAC                     |
| Probe PBGD    | CATCTTTGGGCTGTTTTCTTCCGCC               |
| hMDSEVI1-F    | GAAAGACCCCAAGTTATGGATGG                 |
| hMDSEVI1-R    | GTAATTGGCCAGCTTCCAACA                   |
| probe MDSEVI1 | TCTTAGACGAATTTTACAATGTGAAGTTCTGCATAGATG |
| mMeis1-F      | AGCGGTGGCCATACTTCAC                     |
| mMeis1-R      | CACTGTTGTCCAAGCCATCA                    |
| mHPRT-F       | AGCCTAAGATGAGCGCAAGT                    |
| mHPRT-R       | ATGGCCACAGGACTAGAACA                    |
| mEVI1ex11-F   | CCAATCTTGACAGACACCTTGAA                 |
| mEVI1ex12-R   | GGTTGCTGTTCCCGATGAAATT                  |
| mMDSEVI1-F    | CCCTCCCTCCACATTCAAGA                    |
| mMDSEVI1-R    | GGTCCTCTTCACTCTTCATGAAC                 |
| mPRDM16-F     | CCACCAGCGAGGACTTCAC                     |
| mPRDM16-R     | GGAGGACTCTCGTAGCTCGAA                   |
| mDOT1L-F      | TGGAGAACTATGTCCTGATCGAC                 |
| mDOT1L-R      | GTGCCGCAGAAGTCCATTG                     |
| mHoxA9-F      | GAGAGCGGCGGAGACAAGCC                    |
| mHoxA9-R      | TCGTACCTGCGGTCCCGTGT                    |

Primer Sequences ChIP Q-PCR

|                       |                        |
|-----------------------|------------------------|
| hu-ChIP-Evi1-k4 FW    | CAAAGGGTCCGAATGTGACT   |
| hu-ChIP-Evi1-k4 REV   | ATCTGAATTCCTGGCACTGG   |
| huChIPHoxA9_k4peakFw  | TGTCCTCTTGTCCCCCTTCT   |
| huChIPHoxA9_k4peakRev | CAGGTTGGGAAAGAAAGACGAA |
| huChIPbAct_k4peakFw   | GTGGACATCTCTTGGGCACT   |
| huChIPbAct_k4peakRev  | AGGGCAGTTGCTCTGAAGTC   |
| ChIPmEvi1prom1 FW     | ACAAATCCTGCCTGGAGAAA   |
| ChIPmEvi1prom1 Rev    | ATCTCCAGAGTGGTTCGGAAG  |
| ChIPmEvi1prom2 FW     | ACATGTTTCTGGGGATGGTG   |
| ChIPmEvi1prom2 Rev    | CGAGGGAGAAAGGGAGCTAT   |
| ChIPmEvi1Exon1#1 FW   | CCCTACCTTCGCACACTTTC   |
| ChIPmEvi1Exon1#1 Rev  | GAGCCGGGTTTGGTGTATTT   |
| ChIPmEvi1Exon1#2 FW   | CGAAATGTTAGCGGGTGTTT   |
| ChIPmEvi1Exon1#2 Rev  | TTCGCTTACCTTCCGATTTC   |
| ChIPmEvi1Exon9 FW     | GCAATTGAGAACATGGCAGA   |
| ChIPmEvi1Exon9 Rev    | CTGCAGGTGTAGCGCTCTTT   |
| ChIPmEvi1Exon13 FW    | TAAAAAGGCTTTGGCAACCA   |
| ChIPmEvi1Exon13 Rev   | GGCACCAGCTTCTTCGTAGT   |
| ChIPmHoxA9 FW         | ATGTTGACTGGCGATTTTCC   |

|                   |                      |
|-------------------|----------------------|
| ChIPmHoxA9 Rev    | AGAGAACTGCCAACCCTCAA |
| ChIPmHoxC8 FW     | CAGGCTCAGCCCTGACTTAC |
| ChIPmHoxC8 Rev    | CCAGCCCTAGCTAATGGACA |
| ChIPm_b_actin FW  | GATGCTGACCCTCATCCACT |
| ChIPm_b_actin Rev | ATGAAGAGTTTTGGCGATGG |

Primer sequences for detection of Common MLL-Fusions

|             |                          |
|-------------|--------------------------|
| Forward MLL | CGTCGAGGAAAAGAGTGA       |
| ENL Rev     | TACCCCGACTCCTCTACTT      |
| ELL Rev     | CCCATGACTGGAGACATACT     |
| AF6 Rev     | TCCCGATCATCTTTGTTC       |
| AF9 Rev     | ATGTTTCCAGGTAACCTCTGTAGT |
| AF10 Rev    | CTGGAAATTTGCATTTGTAA     |

**Table S2.**

Patient characteristics of 102 *MLL* rearranged AML patients. Per patient, age, sex, FAB type, karyotype, *MLL* rearranged fusion gene, relative expression (RE) of *EVI1* scoring of *EVI1* (over)expression (+) or no *EVI1* expression (-) are shown. The karyotyping was performed according to the International System for Human Cytogenetic Nomenclature (1995) for each patient (N.D. Not Determined).

| Sample | Age | Sex | FAB  | G-banding                                                                                                                                                     | MLL-fusion          | RE EVI1 | EVI1+ |
|--------|-----|-----|------|---------------------------------------------------------------------------------------------------------------------------------------------------------------|---------------------|---------|-------|
| 642    | 48  | M   | M1   | 46,XY,t(10;11)(q22;q23)                                                                                                                                       | MLL-AF10            | 0.44    | +     |
| 114    | 30  | M   | M4   | 46,XY,t(10;11)(q11;q23)[8]/45,XY,add(1)(p36),t(10;11)(q11;q23),der(12)t(12;18)(p11;q11),-18[11]                                                               | MLL-AF10            | 0.45    | +     |
| 2535   | 38  | F   | M5   | 47, XX, i(8)(q10), +19 [1]/48, idem, +i(8) [2]/49, idem, +i(8), +22 [4]/50, idem, +i(8), +i(8), +22 [2]/46, XX [1].                                           | MLL-AF10            | 0.0     | -     |
| 2281   | 20  | M   | M4   | 46,XY[58]; Cryptic rearrangement                                                                                                                              | MLL-AF10            | 0.0     | -     |
| 292    | 50  | F   | N.D. | 47,XX,add(7)(p22),inv(8)(p23p13),+8,del(10)(p11),der(11)t(11;10;7)(pter->11q23::?->?::q23->pter),del(19)(q13)                                                 | MLL-AF10            | 0.0     | -     |
| 336    | 37  | M   | M4   | 46,XY,ins(10;11)(p13;q23q13)[12]/48,XY,+8,ins(10;11)(p13;q23q13),+19[7]/46,XY[1]                                                                              | MLL-AF10            | 0.05    | -     |
| 582    | 31  | M   | M5   | 46,XY,ins(10;11)(p13;q13q23)                                                                                                                                  | MLL-AF10            | 0.01    | -     |
| 3317   |     |     |      | 47,XX,+add(1)(p1?2)[24]/46,XX[3]                                                                                                                              | MLL-AF10<br>MLL-ELL | 0.0     | -     |
| 2255   | 45  | M   | M1   | 46,XY,t(4;11)(q21;q23)[18]                                                                                                                                    | MLL-AF4             | 0.0     | -     |
| 524    | 38  | F   | N.D. | 46,XX,t(4;11)(q21;q23),del(20)(q13)[7]/46,XX,t(4;11)(q21;q23),del(5)(q31q33),del(12)(p11),del(20)(q13)[19]                                                    | MLL-AF4             | 0.0     | -     |
| 15017  | 34  | M   | M4   | 46,XY,t(4;11)(q21;q23)[21]                                                                                                                                    | MLL-AF4             | 0.0     | -     |
| 818    | 60  | F   | M0   | 48,XX,t(6;11)(q27;q23),+21,+21[9]                                                                                                                             | MLL-AF6             | 2.22    | +     |
| 590    | 59  | F   | M1   | 46,XX,t(6;11)(q27;q23)                                                                                                                                        | MLL-AF6             | 0.67    | +     |
| 675    | 58  | F   | M4   | 46,XX,t(6;11)(q27;q23)                                                                                                                                        | MLL-AF6             | 3.75    | +     |
| 18     | 41  | F   | M1   | 46,XX,t(6;11)(q26;q23)                                                                                                                                        | MLL-AF6             | 1.92    | +     |
| 964    | 34  | F   | M4   | 46,XX,t(6;11)(q27;q23)                                                                                                                                        | MLL-AF6             | 0.5     | +     |
| 2207   | 31  | M   | M1   | 46,XY,t(6;11)(q25;q23)                                                                                                                                        | MLL-AF6             | 0.7     | +     |
| 6238   | 30  | F   | M4   | 46,XX,t(6;11)(q27;q23)[28]                                                                                                                                    | MLL-AF6             | 1.1     | +     |
| 15018  | 30  | M   | M4   | 46,XY,t(6;11)(q27;q23)                                                                                                                                        | MLL-AF6             | 6.5     | +     |
| 549    | 28  | F   | M0   | 46,XX,t(6;11)(q27;q23)                                                                                                                                        | MLL-AF6             | 0.42    | +     |
| 14294  | 19  | M   | M5   | 46,XY,t(6;11)(q26;q22)                                                                                                                                        | MLL-AF6             | 0.6     | +     |
| 5351   | 67  | F   | M4   | 46,XX,t(6;11)(q27;q23)[36]                                                                                                                                    | MLL-AF6             | 0.39    | +     |
| 2196   | 39  | M   | M5   | NULL; Cryptic rearrangement                                                                                                                                   | MLL-AF6             | 2.2     | +     |
| 2272   | 35  | F   | M5   | 47,XX,+8,add(9)(34)[19]/47,XX,+8,add(17)(q25)[1]/48,XX,+8,+8,add(17)(q25)[1]/46,XX[36]; Cryptic rearrangement                                                 | MLL-AF6             | 0.0     | -     |
| 15015  | 40  | M   | M5   | 46,XY[35],46,XY,t(6;11)(q26orq27;q23)[6]                                                                                                                      | MLL-AF6             | 0.0     | -     |
| 889    | 22  | F   | M5   | 45,XX,t(6;11)(q27;q23),-8,+2x i(8)(q10)                                                                                                                       | MLL-AF6             | 0.0     | -     |
| 14454  | 72  | F   | N.D. | 45,XX,add(1)(p?),der(2)t(2;6)(p16;q13)t(2;6)(q32;p12),add(5)(q21),der(5)t(5;18)(q31;?),?inv(7)(q31q35),der(9)t(9;11)(q22~31;q13),del(12)(q13q23),-17,-18,+mar | MLL-AF9             | 0.1     | +     |
| 14290  | 62  | F   | M1   | 46,XX,t(9;11)(p22;q23)[16]                                                                                                                                    | MLL-AF9             | 0.7     | +     |
| 14456  | 61  | F   | Sec  | 46,XX,t(9;11)(p22;q23)[21]                                                                                                                                    | MLL-AF9             | 2.6     | +     |
| 7072   | 61  | M   | M4   | 46,XY,der(11)(q2?)[3]/46,XY[18].ish t(9;11)(p22;q23)                                                                                                          | MLL-AF9             | 0.1     | +     |
| 464    | 60  | F   | N.D. | 46,XX,t(9;11)(p22;q23)                                                                                                                                        | MLL-AF9             | 4.38    | +     |
| 2682   | 57  | F   | M4   | 46,XX,t(2;9;11)(p13;p22;q23)                                                                                                                                  | MLL-AF9             | 1.0     | +     |
| 14457  | 51  | M   | N.D. | 46,XY,t(9;11)(p22;q23)[18]                                                                                                                                    | MLL-AF9             | 0.7     | +     |
| 709    | 51  | M   | M4   | 46,XY,t(4;11;9)(q27;q23;p22)                                                                                                                                  | MLL-AF9             | 4.6     | +     |
| 1055   | 46  | M   | M4   | 46,XY,t(9;11)(p22;q23)                                                                                                                                        | MLL-AF9             | 8.15    | +     |
| 485    | 45  | F   | N.D. | 46,XX,t(9;11)(p22;q23)[13]/47,XX,t(9;11)(p22;q23),+19[2]                                                                                                      | MLL-AF9             | 6.52    | +     |
| 716    | 43  | F   | M0   | 46,XX,t(9;11)(p22;q23)                                                                                                                                        | MLL-AF9             | 4.46    | +     |

| Sample | Age | Sex | FAB  | G-banding                                                                     | MLL-fusion         | RE EVI1 | EVI1+ |
|--------|-----|-----|------|-------------------------------------------------------------------------------|--------------------|---------|-------|
| 587    | 34  | M   | M4   | 46,XY,t(9;11)(p22;q23)                                                        | MLL-AF9            | 4.32    | +     |
| 589    | 32  | F   | M5   | 46,XX,t(9;11)(p22;q23)[3]/47,XX,t(9;11)(p22;q23),+13[8]                       | MLL-AF9            | 2.13    | +     |
| 2288   | 31  | M   | M4   | 45,XY,-7,t(9;11)(p21;q23)[33]                                                 | MLL-AF9            | 1.7     | +     |
| 375    | 23  | M   | M5   | 46,XY,t(9;11)(p22;q23)                                                        | MLL-AF9            | 1.42    | +     |
| 261    | 23  | F   | M5   | 46,XX,t(9;11)(p22;q23)                                                        | MLL-AF9            | 6.95    | +     |
| 15014  | 17  | F   | N.D. | 47,XX,t(9;11)(p22;q23),+der(9)t(9;11)(p22;q23)                                | MLL-AF9            | 2.0     | +     |
| 6720   | 38  | F   | M1   | NN; Cryptic rearrangement                                                     | MLL-AF9            | 2.95    | +     |
| 6945   | 33  | M   | M4   | 46,XY/47,XY,+78 (9%)/48,XY,+mar1,+mar2 (90%); Cryptic rearrangement           | MLL-AF9            | 11.77   | +     |
| 7416   | 55  | M   | M4   | 48,XY,+9,+21[9]; Cryptic rearrangement                                        | MLL-AF9            | 2.97    | +     |
| 2749   | 38  | M   | M5   | 46,XY[32]; Cryptic rearrangement                                              | MLL-AF9            | 0.0     | -     |
| 6882   | 37  | M   | M5   | NN; Cryptic rearrangement                                                     | MLL-AF9<br>MLL-ELL | 0.0     | -     |
| 6955   | 31  | F   | M2   | 47,XX,+8[29]/46,XX[1] Cryptic rearrangement                                   | MLL-AF9<br>MLL-ELL | 0.0     | -     |
| 6976   | 31  | F   | M0   | 46,XX[32]; Cryptic rearrangement                                              | MLL-AF9            | 0.0     | -     |
| 7178   | 28  | M   | M5   | 46,XY,del(9)(q?),add(10)(q?24),add(19)(p13 or q13)[cp]; Cryptic rearrangement | MLL-AF9            | 0.0     | -     |
| 14293  | 66  | F   | M5   | 51-52,XX,+4[2],+8,t(9;11)(p22;q23)[3],+13,+16[2],+21[2],+22[2][cp4]/46,XX[3]  | MLL-AF9            | 0.0     | -     |
| 14289  | 59  | M   | M5   | 46,X,-Y,+8,t(9;11)(p21;q23),t(18;20)(q21;p12)[13]                             | MLL-AF9            | 0.0     | -     |
| 2541   | 57  | F   | M5   | 45,XX,-7[3]/45,idem,t(9;11)(p21;q23)[20]/46,XX[3]                             | MLL-AF9            | 0.0     | -     |
| 799    | 56  | M   | M5   | 47,XY,+8,t(9;11)(p22;q23),inv(16)(p13q22),del(17)(p11)                        | MLL-AF9            | 0.0     | -     |
| 210    | 53  | F   | M5   | 47,XX,+8,t(9;11)(p22;q23)                                                     | MLL-AF9            | 0.0     | -     |
| 649    | 52  | F   | M5   | 46,XX,t(9;11)(p22;q23)[10]/47,XX,t(9;11)(p22;q23),+8[4]                       | MLL-AF9            | 0.01    | -     |
| 944    | 50  | M   | M5   | 46,XY,t(9;11)(p22;q23)                                                        | MLL-AF9            | 0.0     | -     |
| 6364   | 49  | M   | M5   | 46,XY,t(9;11)(p22;q23)[19]                                                    | MLL-AF9            | 0.0     | -     |
| 65     | 48  | M   | M5   | 46,XY,t(9;11)(p22;q23)                                                        | MLL-AF9            | 0.0     | -     |
| 274    | 48  | F   | M5   | 46,XX,t(9;11)(p21;q23)                                                        | MLL-AF9            | 0.0     | -     |
| 2694   | 46  | M   | M5   | 46,XY,t(9;11)(p22;q23)                                                        | MLL-AF9            | 0.0     | -     |
| 7166   | 44  | F   | M5   | 46,XX,t(9;11)(q22;q23)[11]/46,XX[4]                                           | MLL-AF9            | 0.0     | -     |
| 3316   | 44  | F   | M5   | 46,XX,t(9;11)(p22;q23),t(10;12)(q21;q24)[22]                                  | MLL-AF9            | 0.0     | -     |
| 5358   | 40  | F   | M5   | 46,XX,add(6)(q2?5),t(9;11)(p22;q23)[20]/                                      | MLL-AF9            | 0.0     | -     |
| 350    | 37  | F   | M5   | 46,XX,t(9;11)(p22;q23)                                                        | MLL-AF9            | 0.0     | -     |
| 413    | 36  | F   | N.D. | 47,XX,t(9;11)(p21;q23),+21                                                    | MLL-AF9            | 0.01    | -     |
| 14288  | 35  | M   | M5   | 46,XY,inv(2)(q1?1q35),t(9;11)(p22;q23)[38]                                    | MLL-AF9            | 0.0     | -     |
| 1083   | 35  | F   | N.D. | 46,XX,t(9;11)(p21;q23)                                                        | MLL-AF9            | 0.01    | -     |
| 348    | 34  | F   | M5   | 47,XX,+8,t(9;11)(p22;q23)[9]/46,XX[2]                                         | MLL-AF9            | 0.0     | -     |
| 14295  | 30  | M   | M5   | 47,XY,+8,t(9;11)(p22;q23)[22]                                                 | MLL-AF9            | 0.0     | -     |
| 15013  | 30  | M   | M3   | 47,XY,+8,der(9)t(9;11)(q;q),t(15;17)(q22;q21)                                 | MLL-AF9            | 0.0     | -     |
| 15019  | 29  | M   | M5   | 50,XY,+5,+6,t(9;11)(p21;q23),+19,+22[4]                                       | MLL-AF9            | 0.0     | -     |
| 691    | 28  | M   | M5   | 46,XY,t(9;11)(p22;q23)[10]/47,XY,+8,t(9;11)(p22;q23)[5]                       | MLL-AF9            | 0.02    | -     |
| 14453  | 28  | M   | N.D. | 46,XY,der(9)ins(9;?)(q12;?)del(9)(q12;q2?2),t(9;11)(p22;q23)[16]              | MLL-AF9            | 0.0     | -     |
| 2285   | 18  | F   | M5   | 46,XX,t(9;11)(p21~22;q23)[57]                                                 | MLL-AF9            | 0.0     | -     |
| 15016  | 64  | M   | NA   | 46,XY,t(11;19)(q23;p13)                                                       | MLL-ENL            | 4.3     | +     |
| 14460  | 57  | F   | NA   | 46,XX,t(11;19)(q23;p13)[29]                                                   | MLL-ENL            | 0.3     | +     |
| 360    | 55  | F   | N.D. | 46,XX,t(11;19)(q23;p13)                                                       | MLL-ENL            | 0.11    | +     |
| 60     | 52  | F   | N.D. | 46,XX,t(11;19)(q23;p13)                                                       | MLL-ENL            | 0.31    | +     |
| 126    | 48  | F   | M4   | 46,XX,t(11;19)(q23;p13)[9]/46,XX[1]                                           | MLL-ENL            | 3.02    | +     |
| 14459  | 75  | F   | M4   | 46,XX,t(11;19)(q23;p13)[5]                                                    | MLL-ENL            | 0.0     | -     |
| 465    | 45  | M   | M5   | 46,XY,t(11;19)(q23;p13)                                                       | MLL-ENL            | 0.0     | -     |
| 572    | 39  | M   | M5   | 45,X,-Y,t(11;19)(q23;p13)                                                     | MLL-ENL            | 0.0     | -     |
| 143    | 39  | M   | M1   | 46,XY,t(2;8)(p12;q24),add(7)(q32),?t(10;11;19)(p13;q23;p13)                   | MLL-ENL            | 0.0     | -     |

| Sample | Age | Sex | FAB  | G-banding                                                                                                   | MLL-fusion | RE EVI1 | EVI1+ |
|--------|-----|-----|------|-------------------------------------------------------------------------------------------------------------|------------|---------|-------|
| 14291  | 38  | F   | N.D. | 47,XX,+X,t(11;19)(q23;p13)[23]                                                                              | MLL-ENL    | 0.0     | -     |
| 3322   | 35  | F   | M5   | 47,XX,+8,t(11;19)(q23;p13)[25]                                                                              | MLL-ENL    | 0.0     | -     |
| 14462  | 34  | F   | M5   | 47,XX,+8,t(11;19)(q23;p13)[25]                                                                              | MLL-ENL    | 0.0     | -     |
| 6981   | 27  | M   | M5   | 46,XY                                                                                                       | MLL-ELL    | 3.2     | +     |
| 7306   | 51  | M   | M5   | 46,XY,t(11;19)(q23;p13.1)[15]/46,XY[5]                                                                      | MLL-ELL    | 0.3     | +     |
| 3328   | 41  | F   | M5   | 46,XX,t(11;19)(q23;p13)[21]                                                                                 | MLL-ELL    | 0.8     | +     |
| 7053   | 29  | F   | M1   | 46,XX,t(1;3)(p13;q29),del(5)(q13q33),del(11)(p13)[16]/92,XXXX,del(5)(q13q33)x2,del(12)(p11.2)x2[4]/46,XX[4] | MLL-ELL    | 0,0     | -     |
| 3289   | 48  | M   | M2   | 46,XY,t(11;19)(q23;p13)[20]                                                                                 | MLL-ELL    | 0.01    | -     |
| 374    | 49  | M   | M4   | 46,XY,t(11;17)(q23;q21)                                                                                     | Other      | 0.12    | +     |
| 247    | 47  | F   | M2   | 46,XX,t(7;11)(p11;q23)                                                                                      | Other      | 0.29    | +     |
| 2229   | 43  | M   | M4   | 47, XY, +11 [14]/ 46, XY [13]                                                                               | Other      | 0.0     | -     |
| 363    | 56  | F   | M4   | 46,XX,t(11;22)(q23;q13)[18]/46,XX[3]                                                                        | Other      | 0.0     | -     |
| 7171   | 22  | M   | N.D. | 48,XY,der(11)del(11)(p13)del(11)(q13q23),+21,+21[17]/46,XY[3]                                               | Other      | 0.0     | -     |
| 2302   | 43  | F   | N.D. | N.D.                                                                                                        | Other      | 0.0     | -     |
| 1102   | 55  | M   | N.D. | 46,XY,t(11;21)(q23;q11)                                                                                     | Other      | 0.0     | -     |
| 613    | 47  | F   | M4   | 46,XX,t(1;11)(q21;q23),del(20)(q11)[4]/46,XX[2]                                                             | Other      | 0.05    | -     |
| 7307   | 40  | F   | M1   | 46,X,ins(X;11)(q13;q23q22)[1]/48,idem,+6,+19[33]/46,XX[7]                                                   | Other      | 0.0     | -     |

Table S3

Distribution of CD14<sup>-</sup>, CD34<sup>+</sup>CD38<sup>+</sup>, CD34<sup>+</sup>CD38<sup>-</sup> in sorted fractions of M5 human leukemias, corresponding to Figure S2.

Percentages are given of the CD14<sup>-</sup> population and the percentages of the CD34<sup>+</sup>CD38<sup>+</sup> and CD34<sup>+</sup>CD38<sup>-</sup> populations within the CD14<sup>-</sup> population.

|                  | Sample | CD14 <sup>-</sup> (%) | CD34 <sup>+</sup> CD38 <sup>+</sup> (%) | CD34 <sup>+</sup> CD38 <sup>-</sup> (%) |
|------------------|--------|-----------------------|-----------------------------------------|-----------------------------------------|
| 3q               | 2747   | 14.7                  | 79.3                                    | 10.97                                   |
| MLL, non MLL-AF9 | 2275   | 22.1                  | 9.09                                    | 2.97                                    |
| MLL, non MLL-AF9 | 2220   | 26.5                  | 0.43                                    | 0.16                                    |
| MLL, non MLL-AF9 | 3221   | 10.5                  | 0.13                                    | 0.47                                    |
| MLL, non MLL-AF9 | 2261   | 6.5                   | 0.52                                    | 0.48                                    |
| MLL-AF9          | 14288  | 73.5                  | 5.11                                    | 0.85                                    |
| MLL-AF9          | 2285   | 50.1                  | 0.20                                    | 0.01                                    |
| MLL-AF9          | 5358   | 21.8                  | 0.02                                    | 0.00                                    |
| MLL-AF9          | 14293  | 28.5                  | 23.33                                   | 56.88                                   |

## Legends to Supplementary Figures S1 to S13:

### Figure S1

**Acute Myeloid Leukemia patients with an 11q23 translocation either expressing *EVI1* (*EVI1*<sup>pos</sup>) or not (*EVI1*<sup>neg</sup>) show a distinct gene expression signature.**

Pairwise Pearson's correlation clustering of 35 11q23 AMLs, using 1455 probe sets (with standard deviation > 4, based on 506 AMLs). Color of boxes represents Pearson's correlation coefficient: with deeper red corresponding to higher positive correlation and deeper blue corresponding to higher negative correlation.

### Figure S2

**Hematopoietic stem and progenitor cells in FAB M5 human leukemias do not express *EVI1* mRNA.**

A) Example of the gating strategy for sorting of CD14-/CD34+/CD38- (immature stem cells) and CD14-/CD34+/CD38+ (progenitor cells) from leukemic cells of FAB M5 AML samples. Table S3 depicts the relative percentages of the CD34+/CD38- and CD34+/CD38+ fractions within the CD14- population. From these two fractions mRNA was isolated, and B) *EVI1* expression of these FAB M5 leukemia samples was determined by RQ-PCR. A 3q26 AML sample was used as positive control. The Relative *EVI1* expression was measured in duplicate and normalized against *EVI1* expression of the cell line SKOV3.

### Figure S3

**Aberrant expression of *EVI1* mRNA in sorted CD34/CD38 fractions of MLL-AF9 rearranged AMLs.**

Bone marrow cells from two MLL-AF9 rearranged AMLs were FACS sorted for the distinct CD34/CD38 populations, with subsequent isolation of mRNA. Relative expression was calculated using PBGD as a reference gene and normalized against the ovarian carcinoma cell line SKOV3.<sup>3</sup> Each measurement was carried out in triplicate and standard deviation is shown per measurement. Note that in the upper panel the relative *EVI1* expression in the CD34+/CD38+ population was not determined, since no cells were present in that fraction of this AML sample.

### Figure S4

**High *Evi1* expression in mBM cells transformed by MLL-Fusion proteins.**

A) Schematic representation of the experimental setup to study *in vitro* the transforming effect of various MLL-fusions transduced into normal mBM cells and its correlation with *Evi1* expression. B) Transformation of normal mBM cells with MLL-Fusions leads to colony formation in methocult with sustained replating capability as compared to an empty vector (EV) control. C) Harvested colonies from MLL-fusion transformed mBM cells showed high *Meis1* and *Evi1* mRNA expression as compared to EV colonies.

### Figure S5

**Generation and characterization of MLL-AF9 transformed, clonal mBM cell lines.**

A) Schematic illustration of the experimental strategy to generate clonal cell lines of MLL-AF9 transduced mononucleated normal mBM cells. B) These clones could be separated in an *Evi1*<sup>pos</sup> and *Evi1*<sup>neg</sup> group based on their *Evi1* mRNA expression, and they retained their *Evi1* expression status after repeated colony cultures (D). Relative *Evi1* mRNA expression of 1 represents equal *Evi1* levels compared to a reference

sample of mBM transduced with empty vector. There was no difference in the growth capacity of *Evi1*<sup>pos</sup> and *Evi1*<sup>neg</sup> clones as judged by colony (C) or cell suspension (E) cultures.

#### Figure S6

##### **H3K79me2 enrichment on the *Evi1* and *Mds1* promoter region of *Evi1*<sup>pos</sup> MLL-AF9 cells.**

ChIP-on-chip experiments for H3K79me2 vs. IgG control on *Evi1*<sup>pos</sup> and *Evi1*<sup>neg</sup> MLL-AF9 transformed mBM clones respectively clone #1 and clone #3. The *Evi1*<sup>pos</sup> clone #3 displayed H3K79me2 enrichment on the *Evi1* and *Mds1* promoter, whereas the *Evi1*<sup>neg</sup> clone #1 did not. Note that both clones exhibited clear H3K79me2 enrichment on MLL-AF9 target genes, like the *HoxA* Cluster genes (B) and *Meis1* (C), whereas a non-target gene, *Myt1*, did not show any enrichment (D).

#### Figure S7

##### **Enrichment of H3K79me2 mark on the *Evi1* promoter of 4166 cells.**

ChIP using H3K79me2 antibody on 4166 cells showing enrichment of H3K79me2 around the TSS of the murine *Evi1* promoter as compared to normal mBM. As controls enrichment on the *HoxA9* promoter and lack of enrichment of *HoxC8* promoter are shown.

#### Figure S8

##### ***Dot1L* knockdown in MLL-AF9 cell line 4166 leads to reduced *Evi1* mRNA expression.**

Murine cell line 4166 was transduced with shRNAs against *Dot1L*, selected on puromycin, and cultured until 72 hours after virus transduction. Subsequent RQ-PCR shows downregulation of *Evi1*, *HoxA9* and *Meis1* after *Dot1L* knockdown (n=3, error bars represent SD).

#### Figure S9

##### **Expression of MLL-AF9 maintains expression of *Evi1* in HSC but does not reactivate *Evi1* expression in GMP.**

Quantitative reverse transcription PCR (qRT-PCR) of relative *Evi1* mRNA levels in HSC and GMP expressing MLL-AF9, two independent experiments (#1; #2). Results were normalized to *Gapdh* as a reference gene. Error bars represent standard deviation of triplicates. N/D = not detectable.

#### Figure S10

##### **Decreased colony formation of MLL-AF9 clones after *Evi1* knockdown.**

ShRNA against *Evi1* and a control (SHC) were transduced in *Evi1*<sup>pos</sup> and *Evi1*<sup>neg</sup> MLL-AF9 clones, resulting in reduced *Evi1* mRNA expression (A). *Evi1* knockdown resulted in reduced colony growth of *Evi1*<sup>pos</sup> clones, whereas *Evi1*<sup>neg</sup> clones were unaffected, showing that the reduced growth was not due to off-target effects of the used shRNA (B). Experiments (n=3) with standard deviation (SD) are shown.

#### Figure S11

##### **4166 cells with reduced levels of *Evi1* are more sensitive to cytostatic drugs *in vitro*.**

MLL-AF9 cell line 4166 was transduced with *Evi1* shRNA or SHC and selected for 3 days on puromycin. Subsequently dose-response curves were generated as described in material and methods, to measure sensitivity to either idarubicin (A) or cytarabine (B) alone, or in combination with a predetermined, fixed concentration of 0.047  $\mu$ M cytarabine (C).

Figure S12

**Co-expression of *Evi1* and *MdsEvi1* in MLL-AF9 transformed mBM clones.**

Parallel upregulation of *Evi1* and *MdsEvi1* in *Evi1*<sup>pos</sup> MLL-AF9 transduced mBM (A). *Evi1*<sup>neg</sup> MLL-AF9 transformed mBM displayed no clear differential higher transcript as compared to the rest MLL-AF9 mBM clones (B).

Figure S13

**MLL-fusion proteins transactivate the promoter of EVI1.**

Relative luciferase activity from reporter gene assays using an EVI1-luc reporter co-transfected with expression constructs harboring empty vector (EV), MLL-fusions, or E2A-PBX. Luciferase activity normalised against Renilla activity and calibrated to empty vector control with mean value  $\pm$  SD from 3 independent experiments are shown.

Figure S1

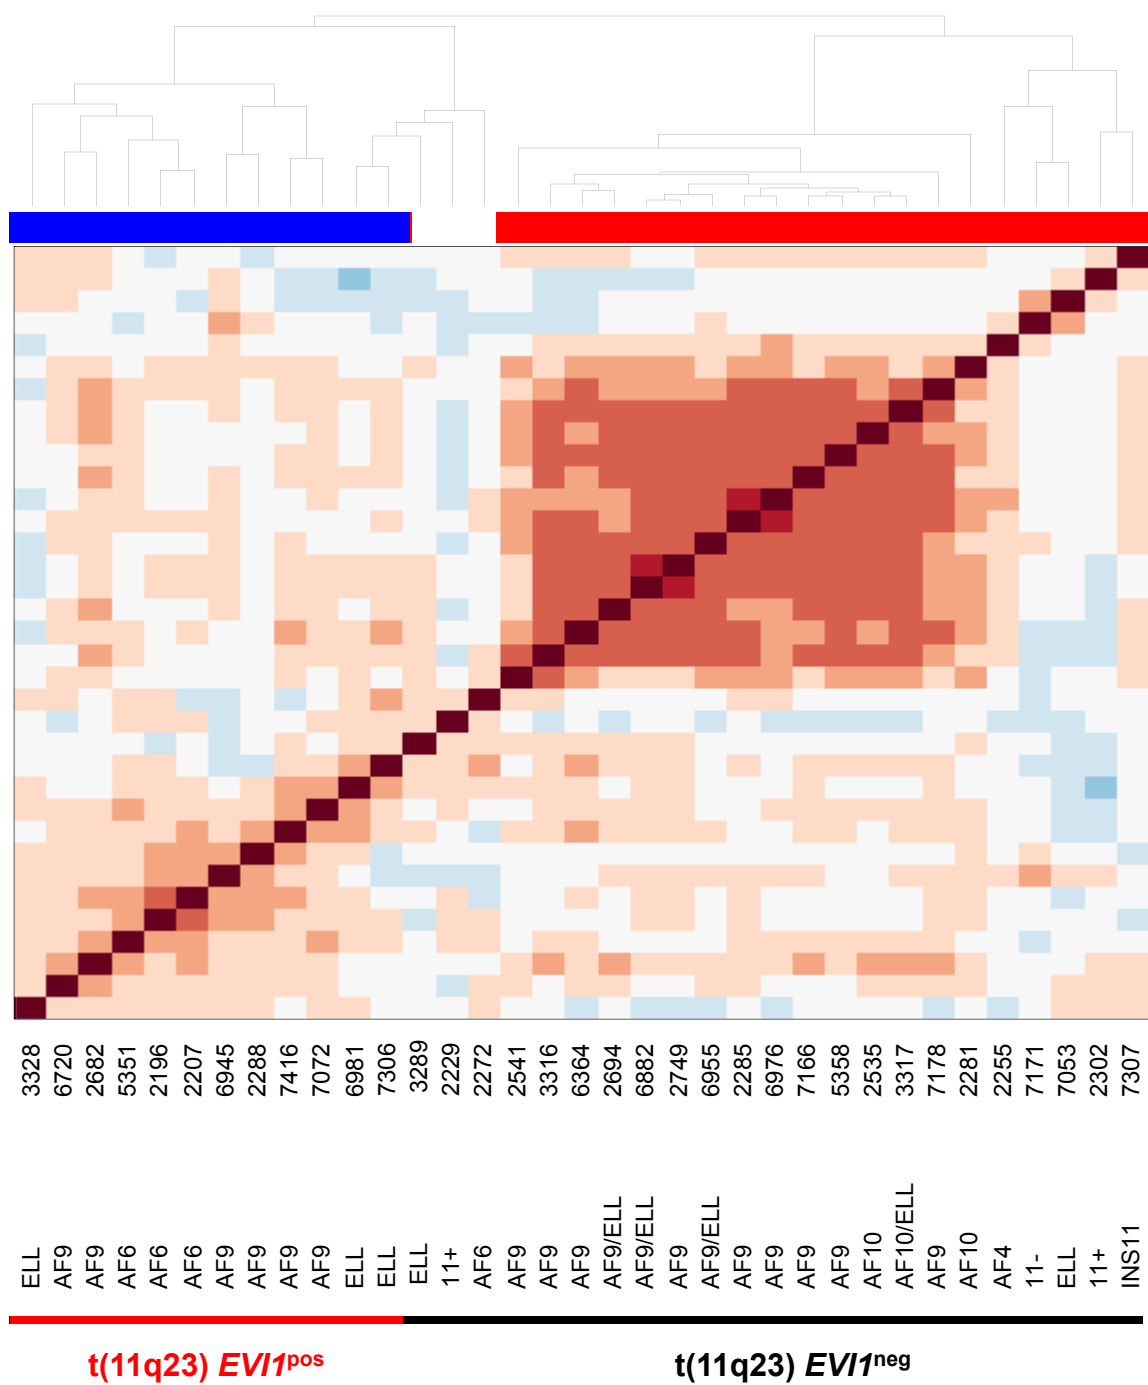

Figure S2

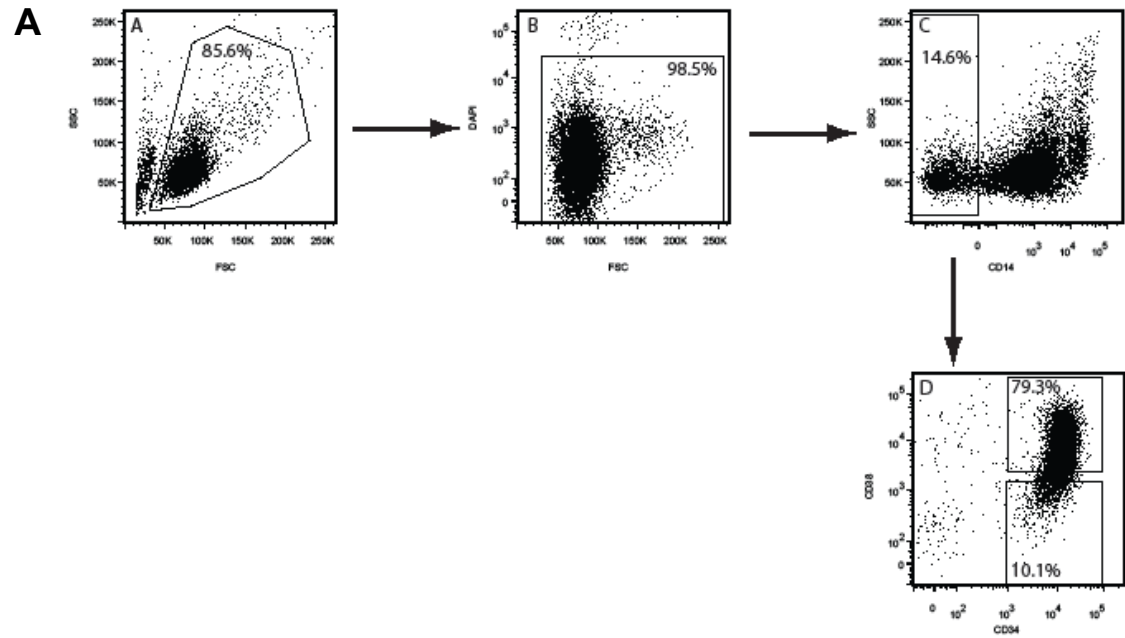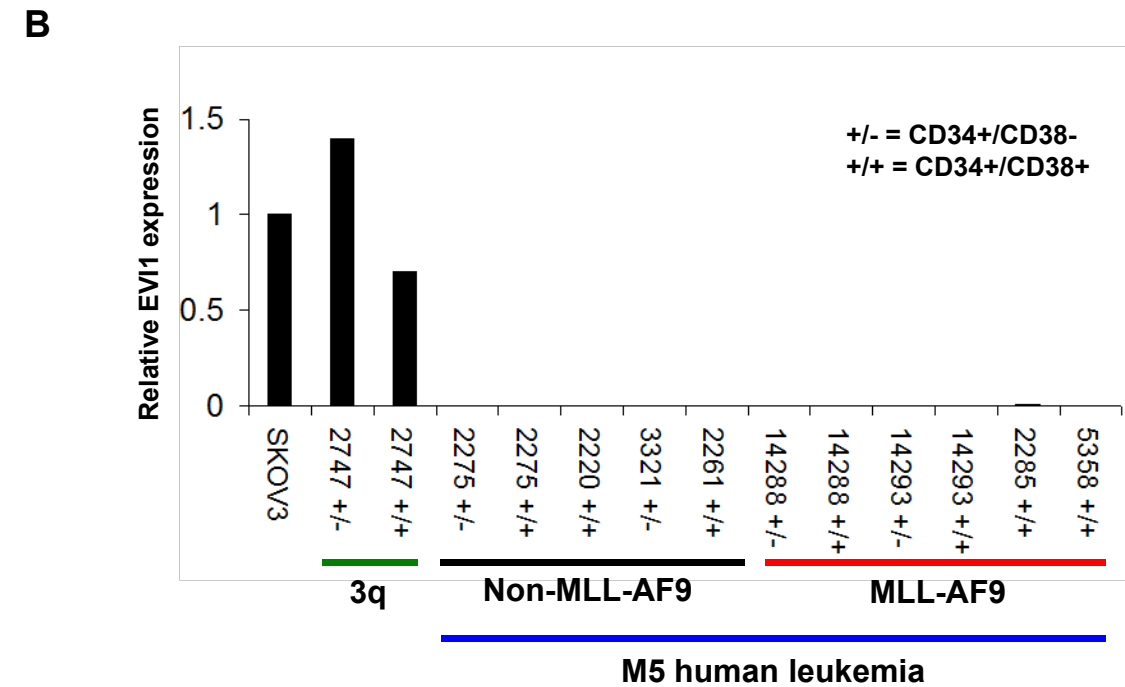

Figure S3

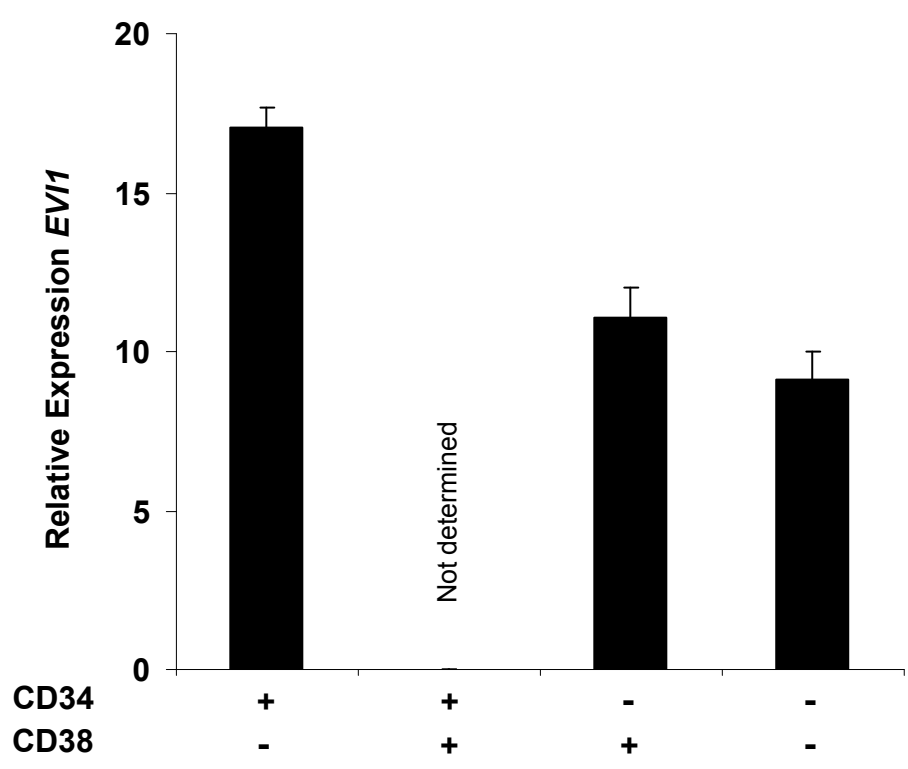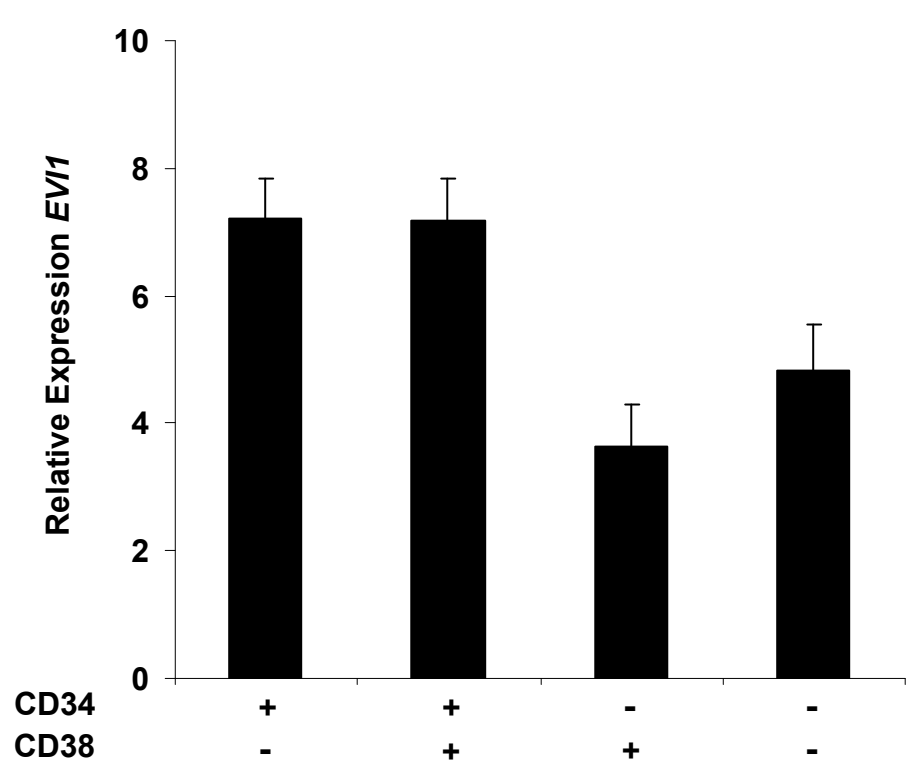

Figure S4

A

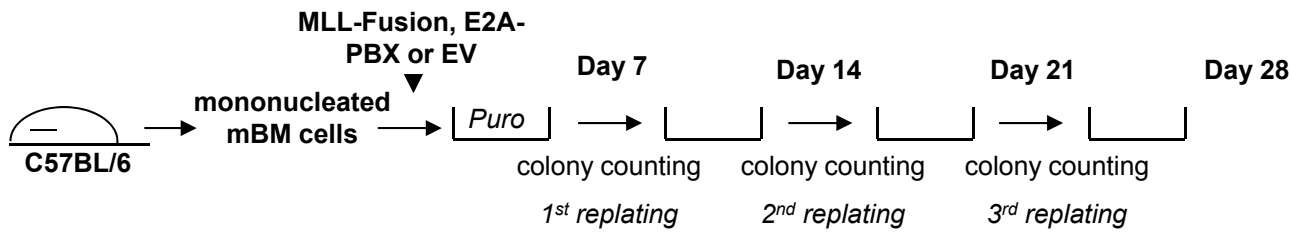

B

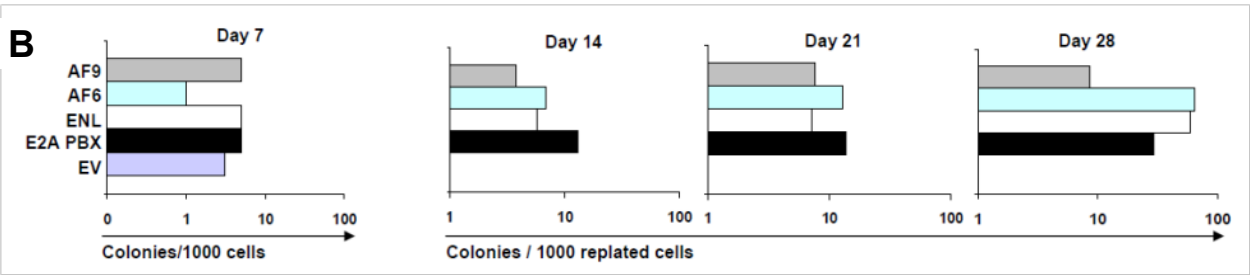

C

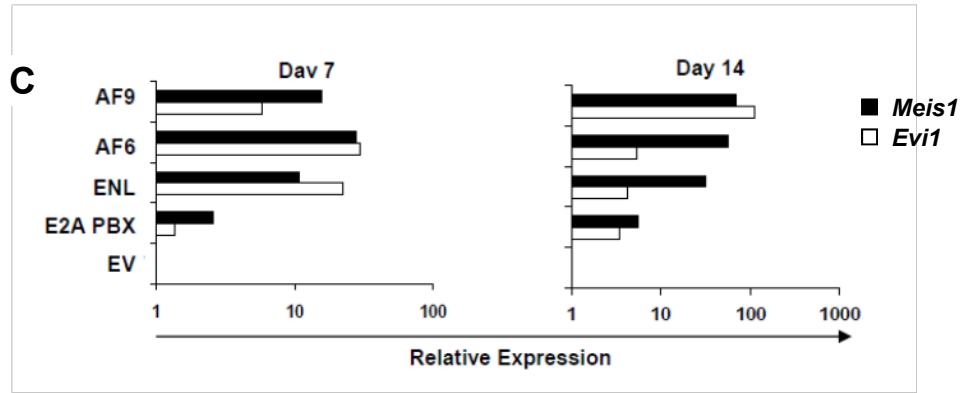

Figure S5

A

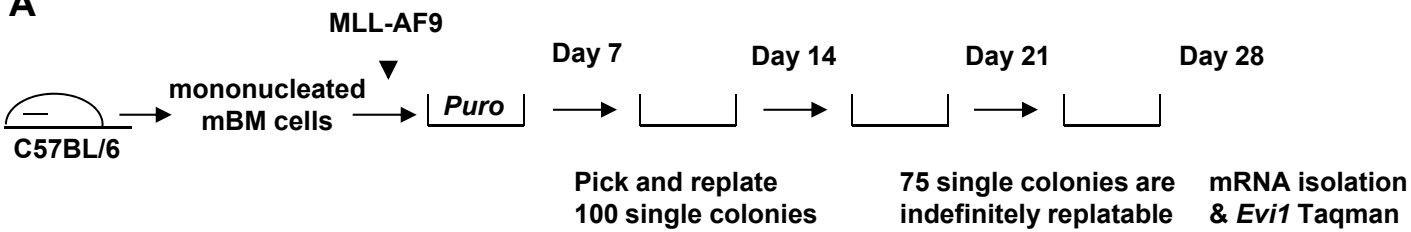

B

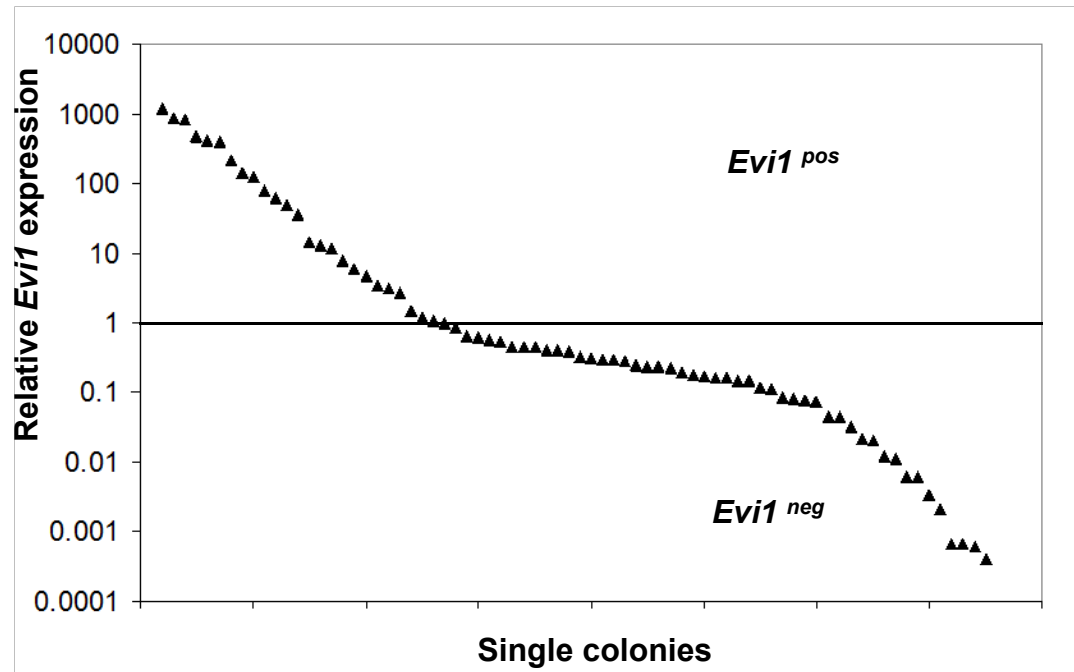

C

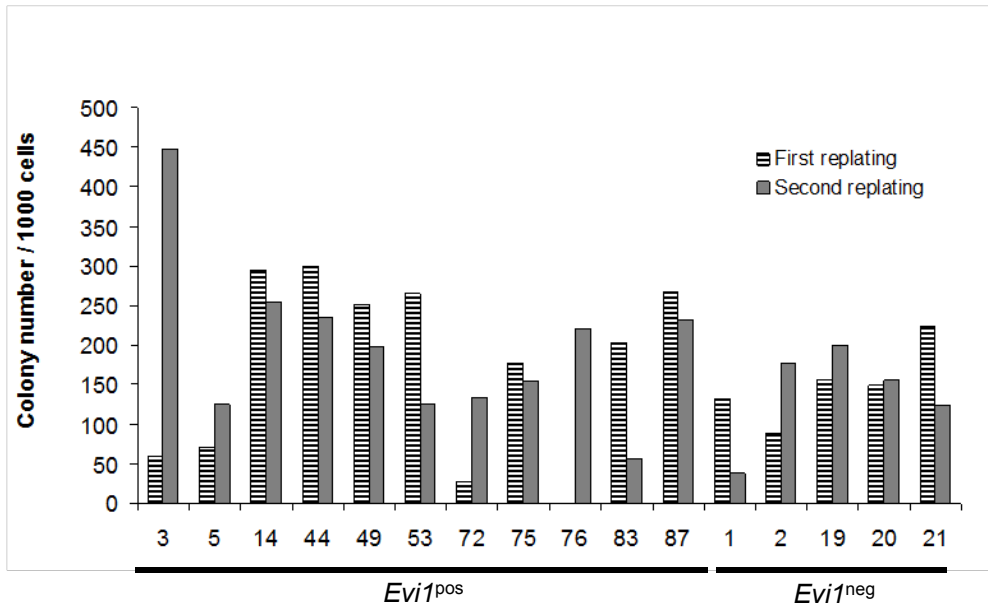

D

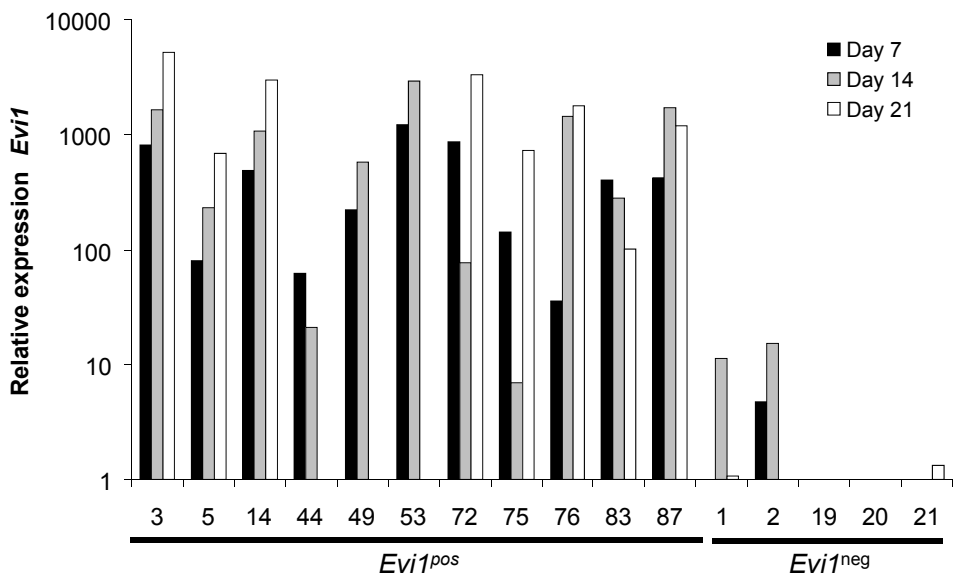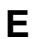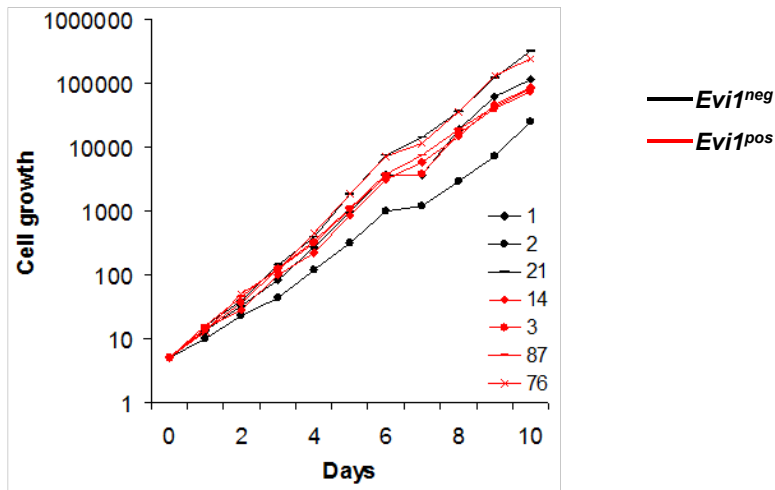

Figure S6

A

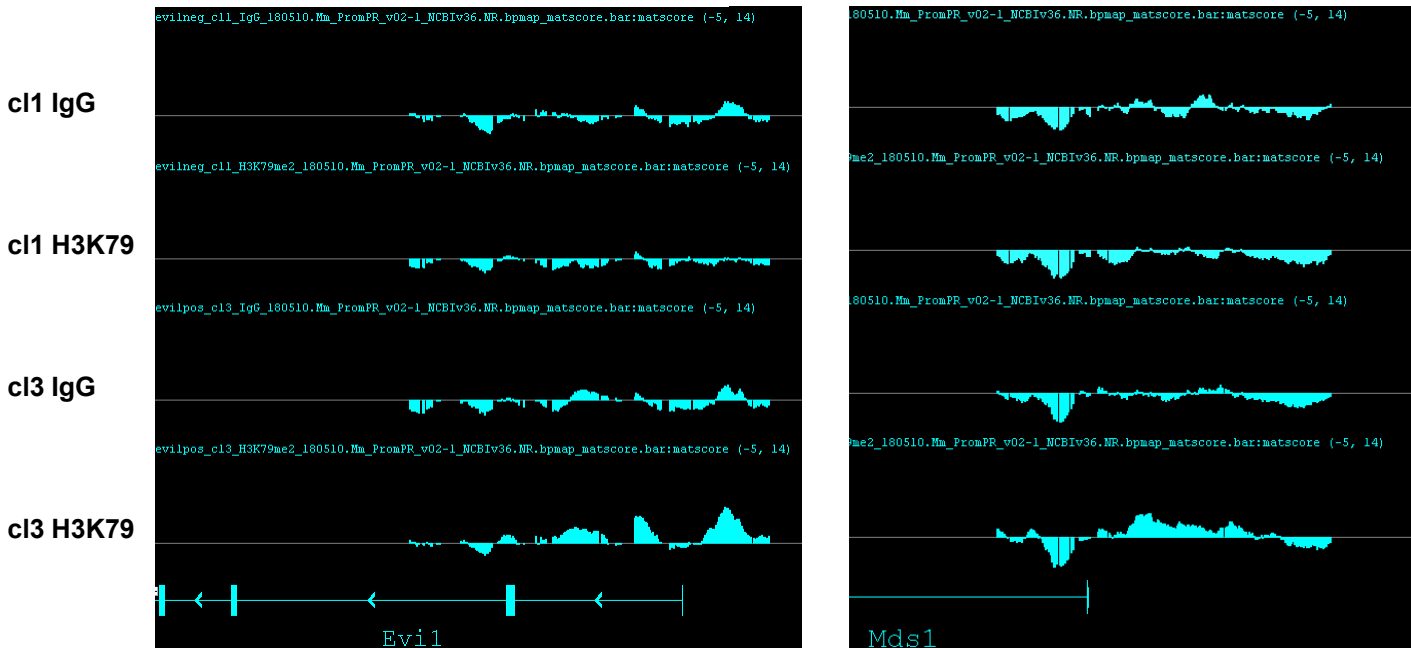

B

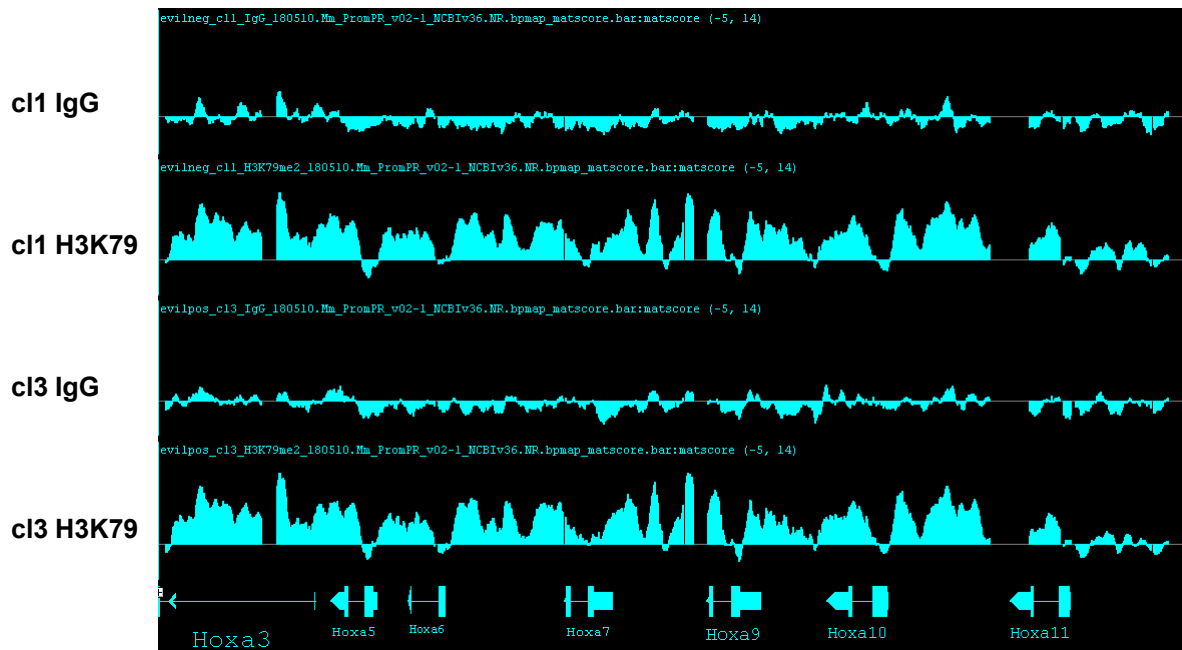

Figure S6

C

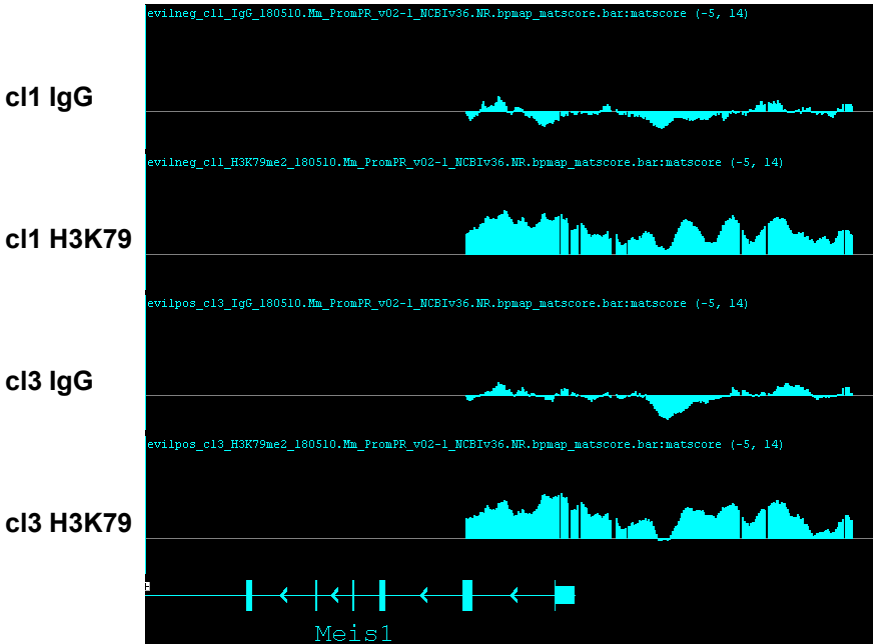

D

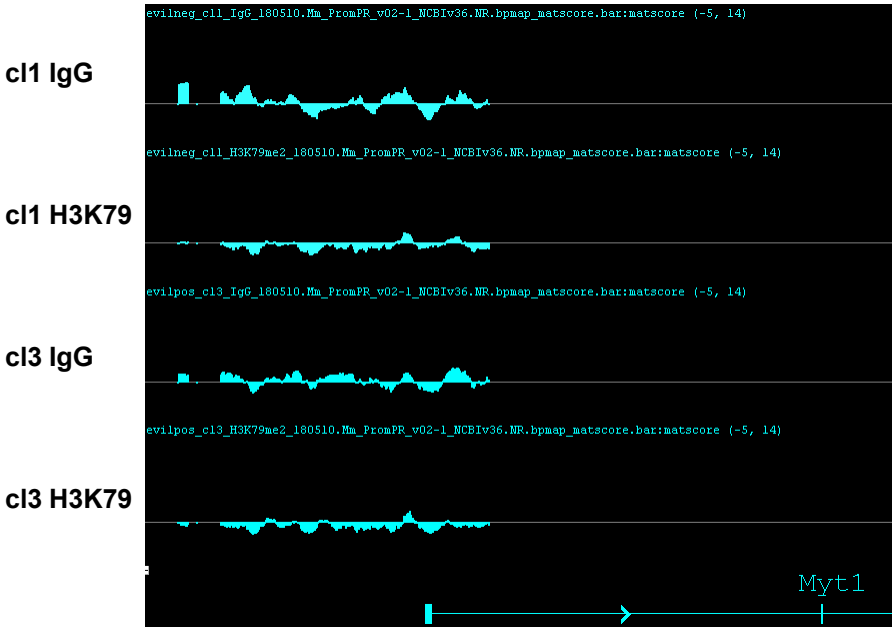

**Figure S7**

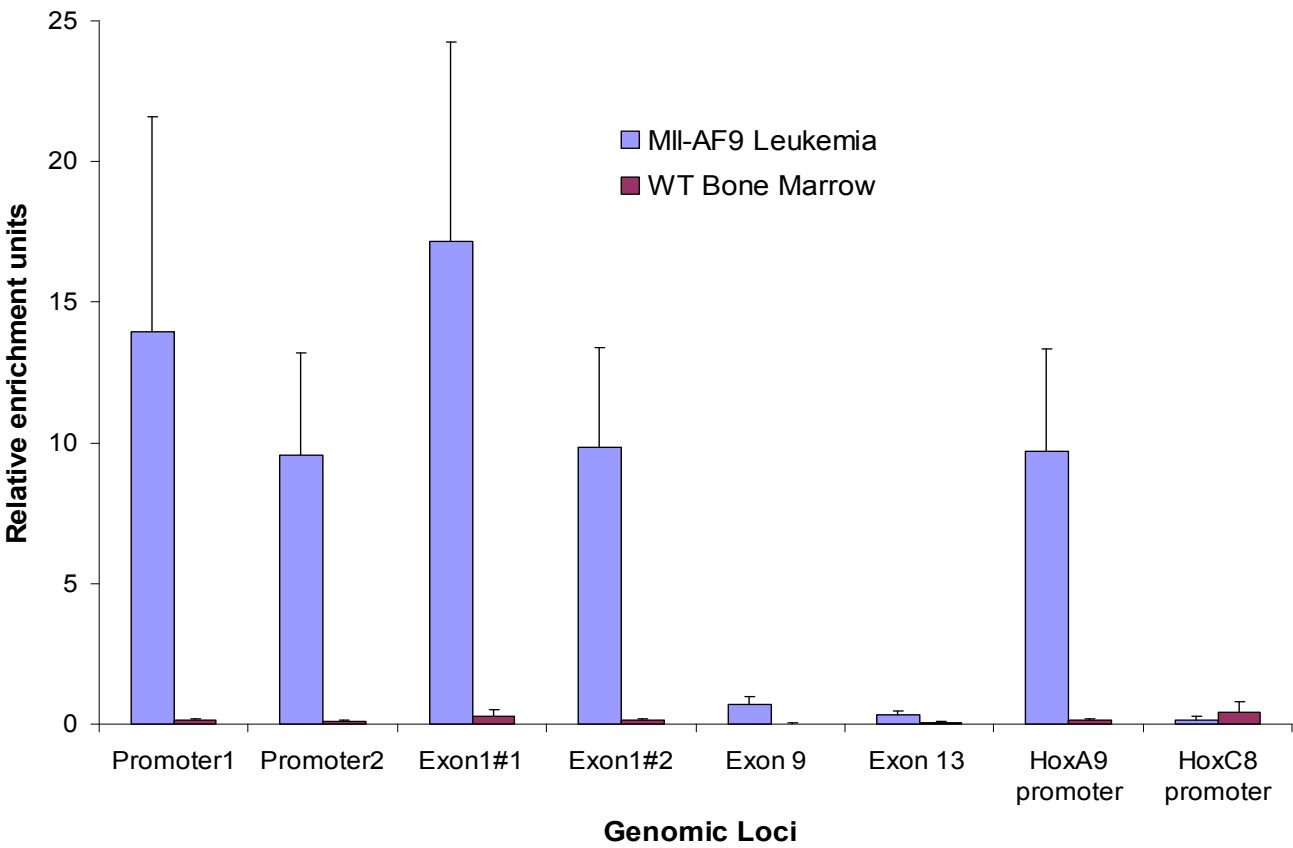

Figure S8

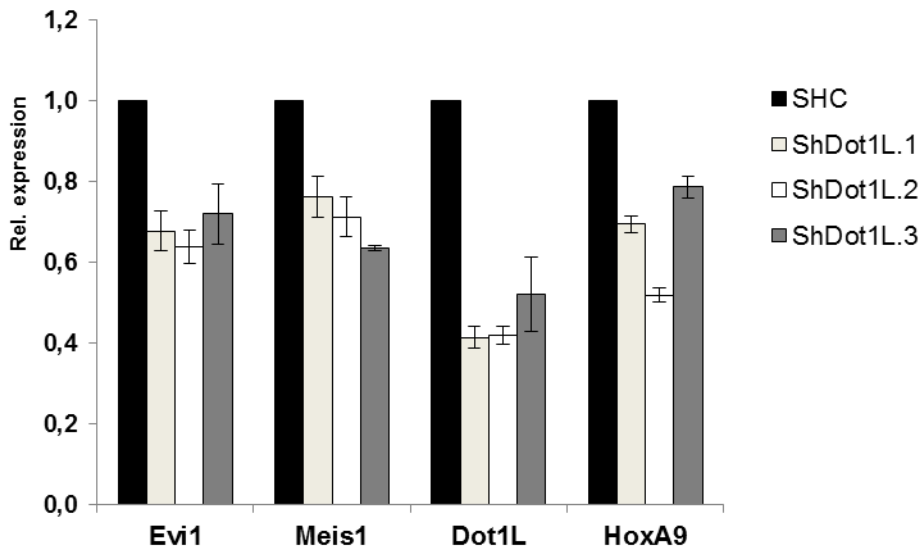

Figure S9

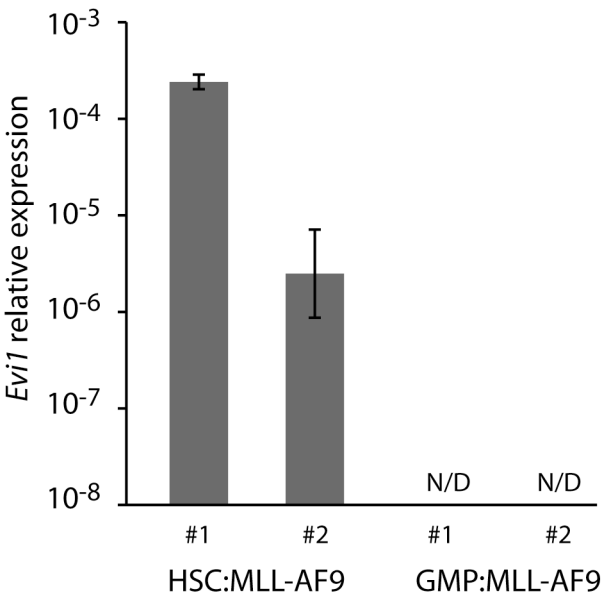

Figure S10

A

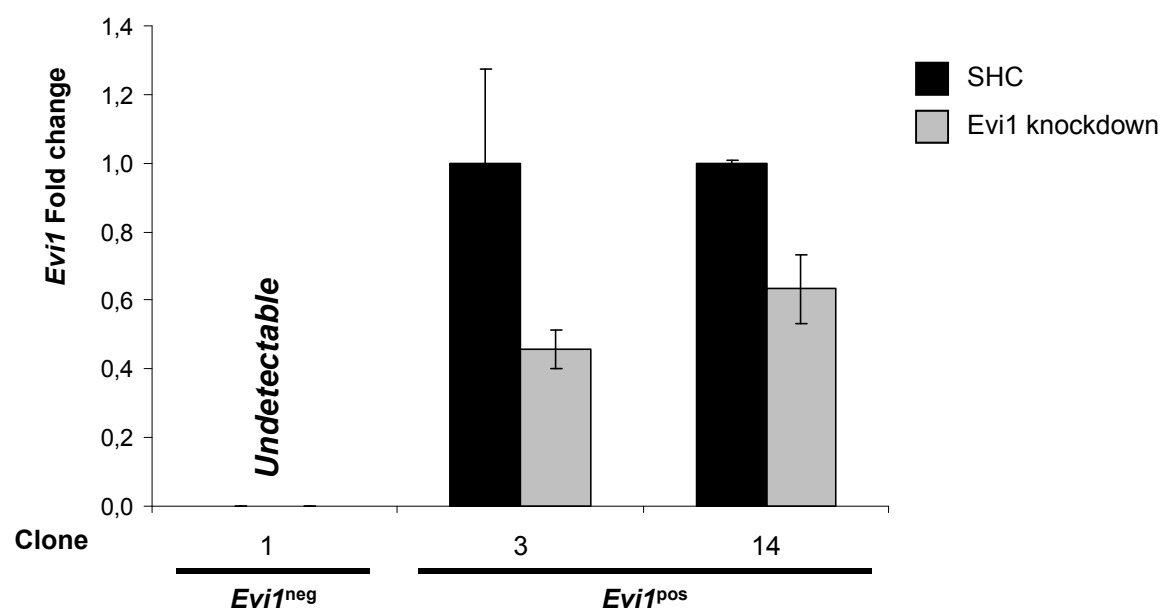

B

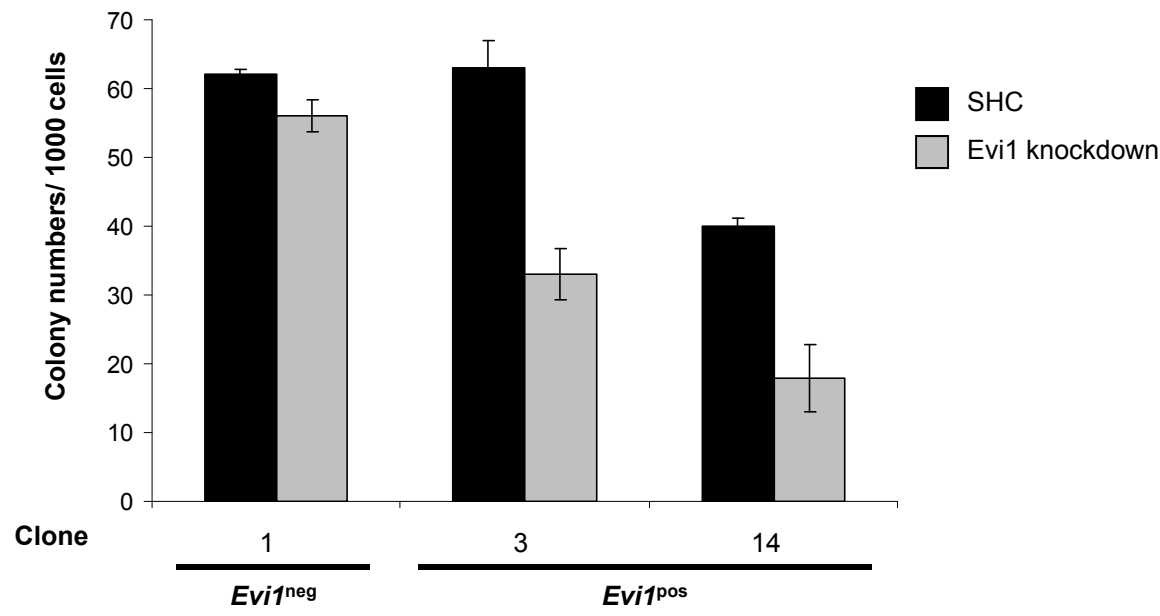

Figure S11

A

|      | 4166 SH  | 4166KD   |
|------|----------|----------|
| EC50 | 0.003688 | 0.002055 |

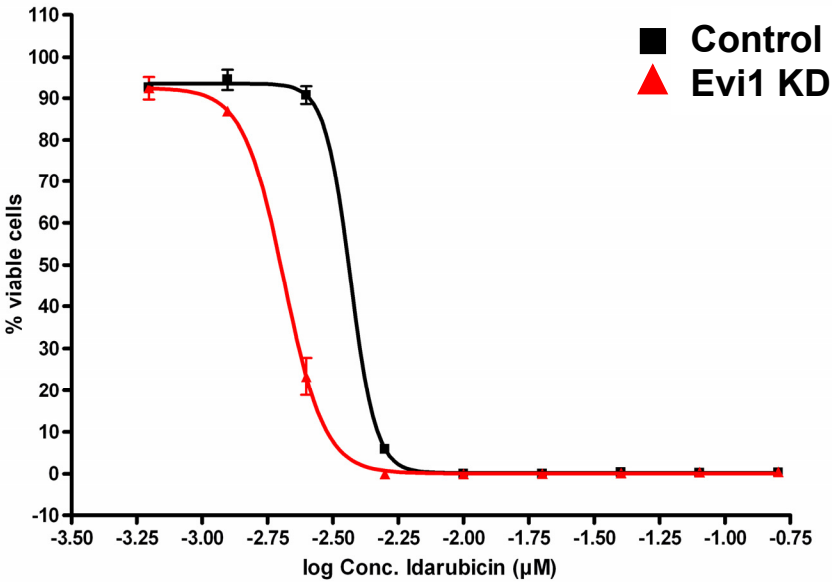

B

|      | 4166 SH | 4166KD |
|------|---------|--------|
| EC50 | 0.2086  | 0.1332 |

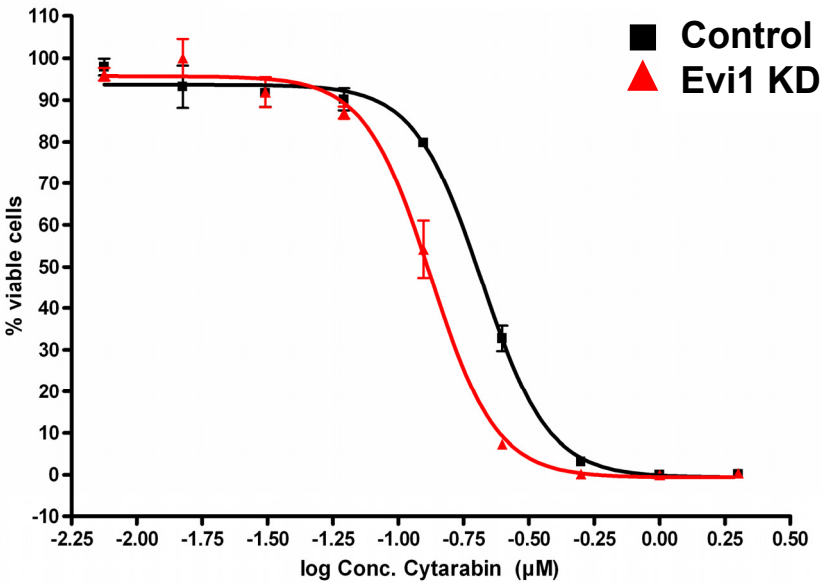

Figure S11

C

|      |          |          |
|------|----------|----------|
|      | 4166 SH  | 4166KD   |
| EC50 | 0.003859 | 0.002579 |

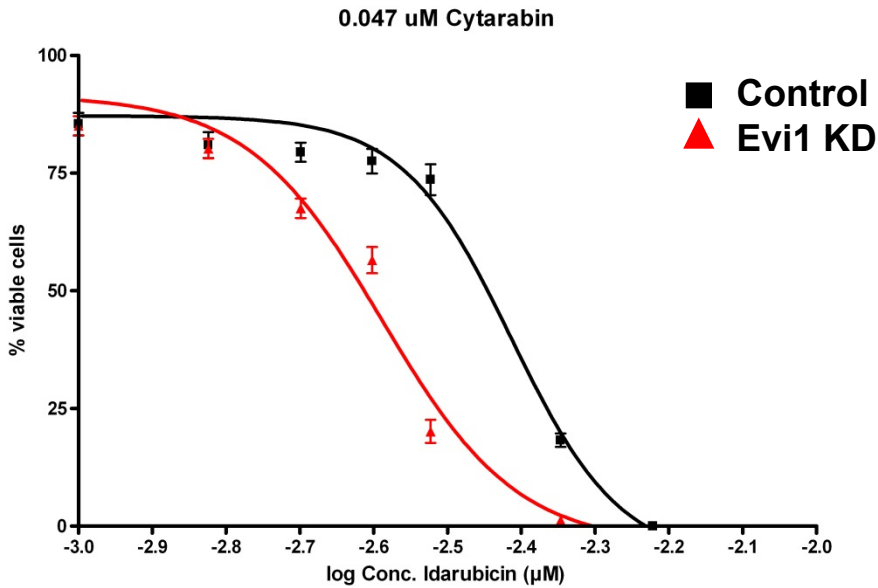

Figure S12

A

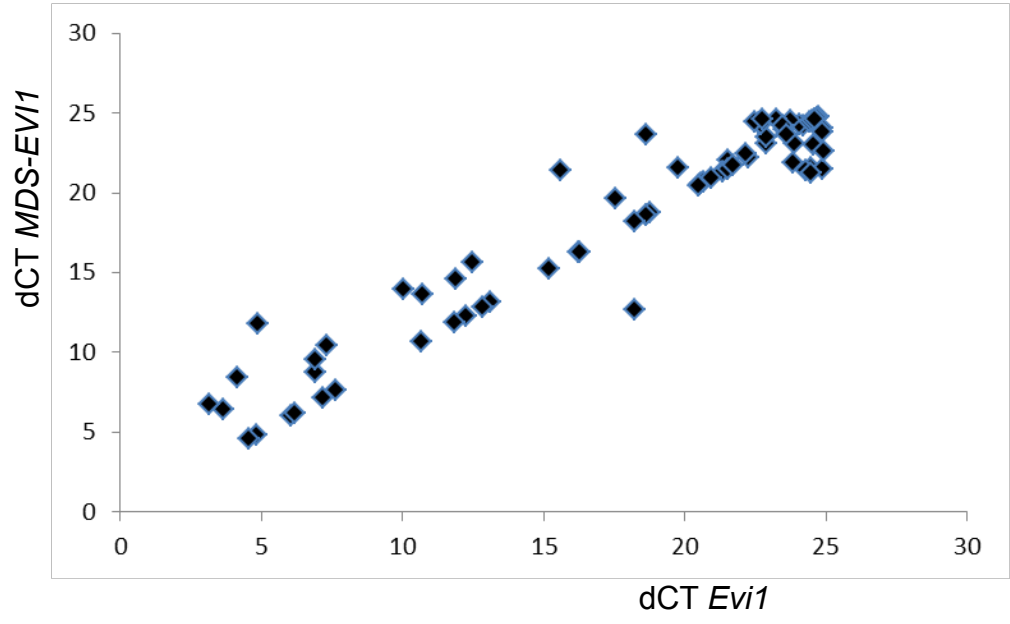

B

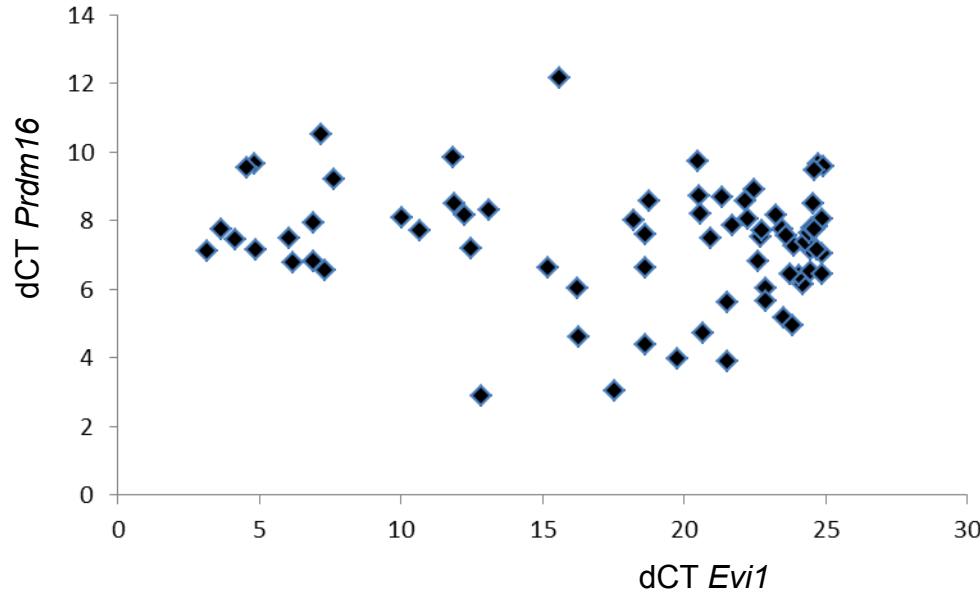

**Figure S13**

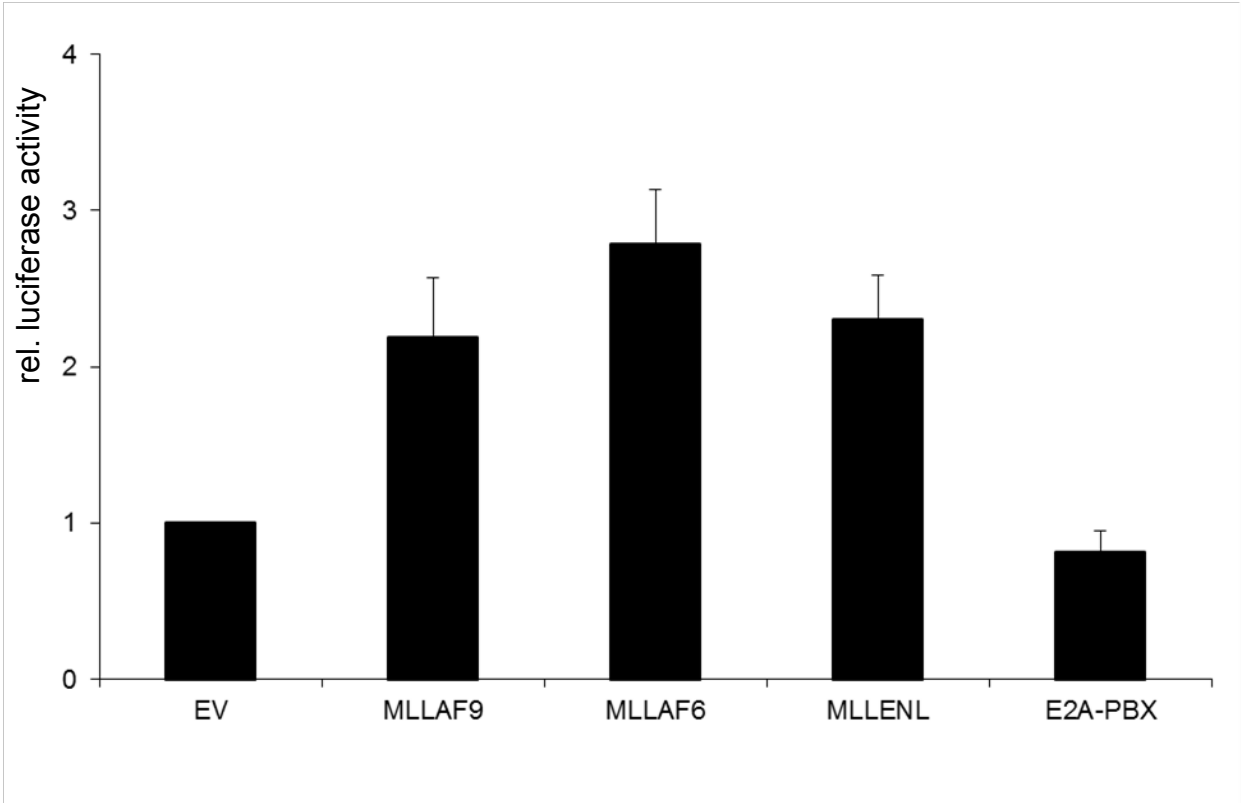

Supplement: supp_blood-2011-11-393827_blood-2011-11-393827-1.pdf [file supp_blood-2011-11-393827_blood-2011-11-393827-1.pdf]
